# Supplementary material for: Accuracy of genome-wide imputation of untyped markers and impacts on statistical power for association studies
Source: PubMed Central journal article supplement (PMC2709633; doi:10.1186/1471-2156-10-27), 2009-06-16

A

Ilmn317K

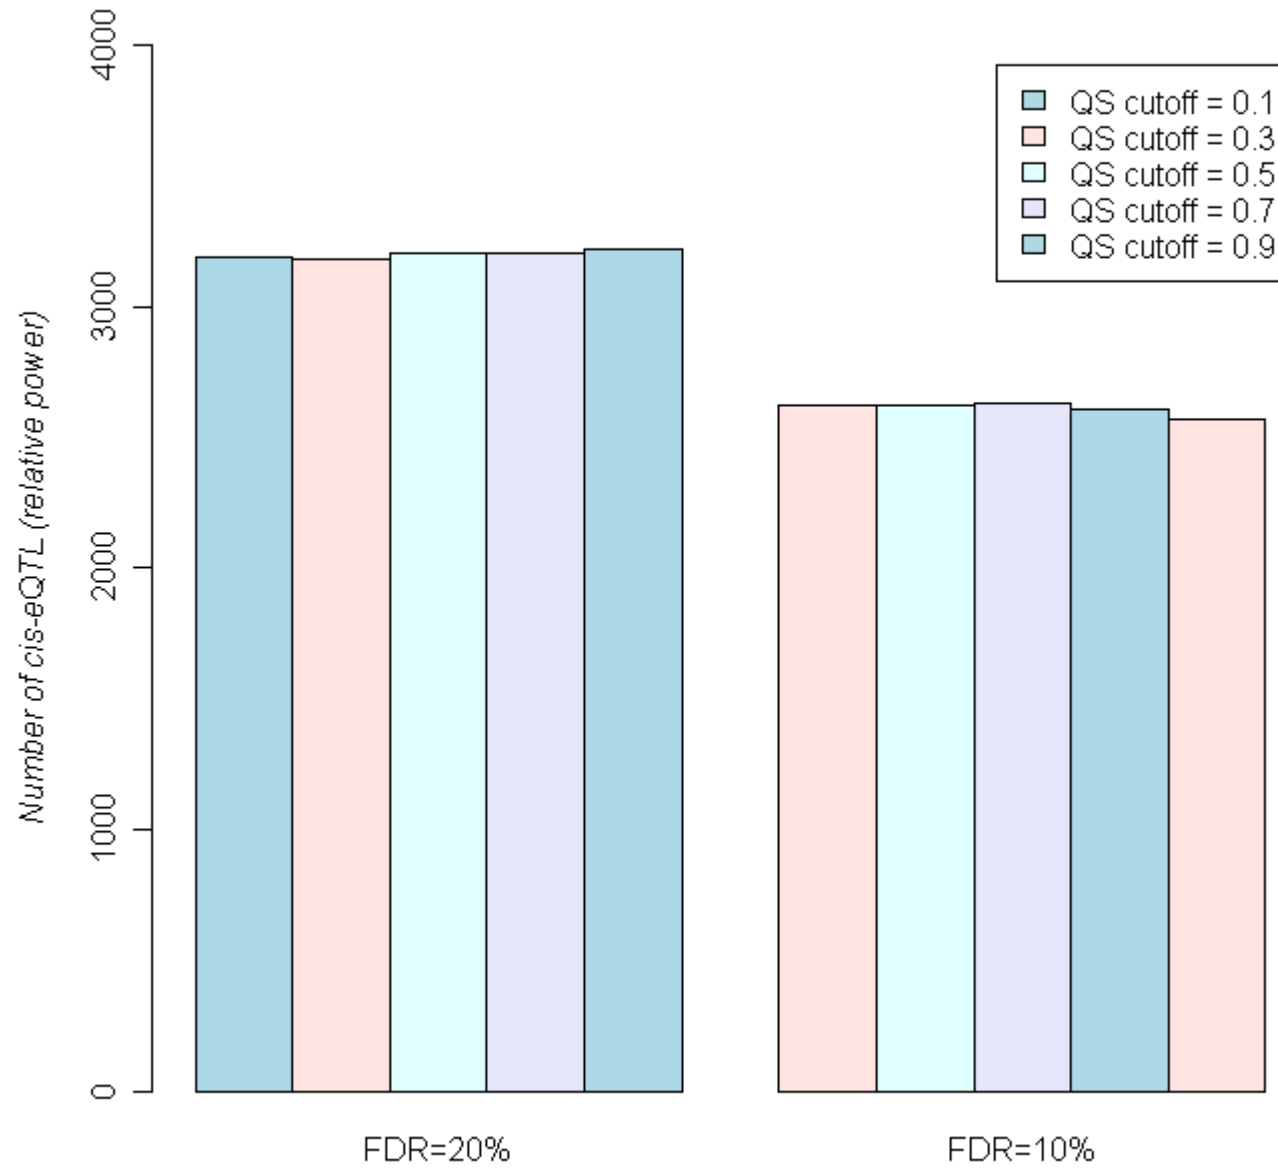

**B****Ilmn650Y**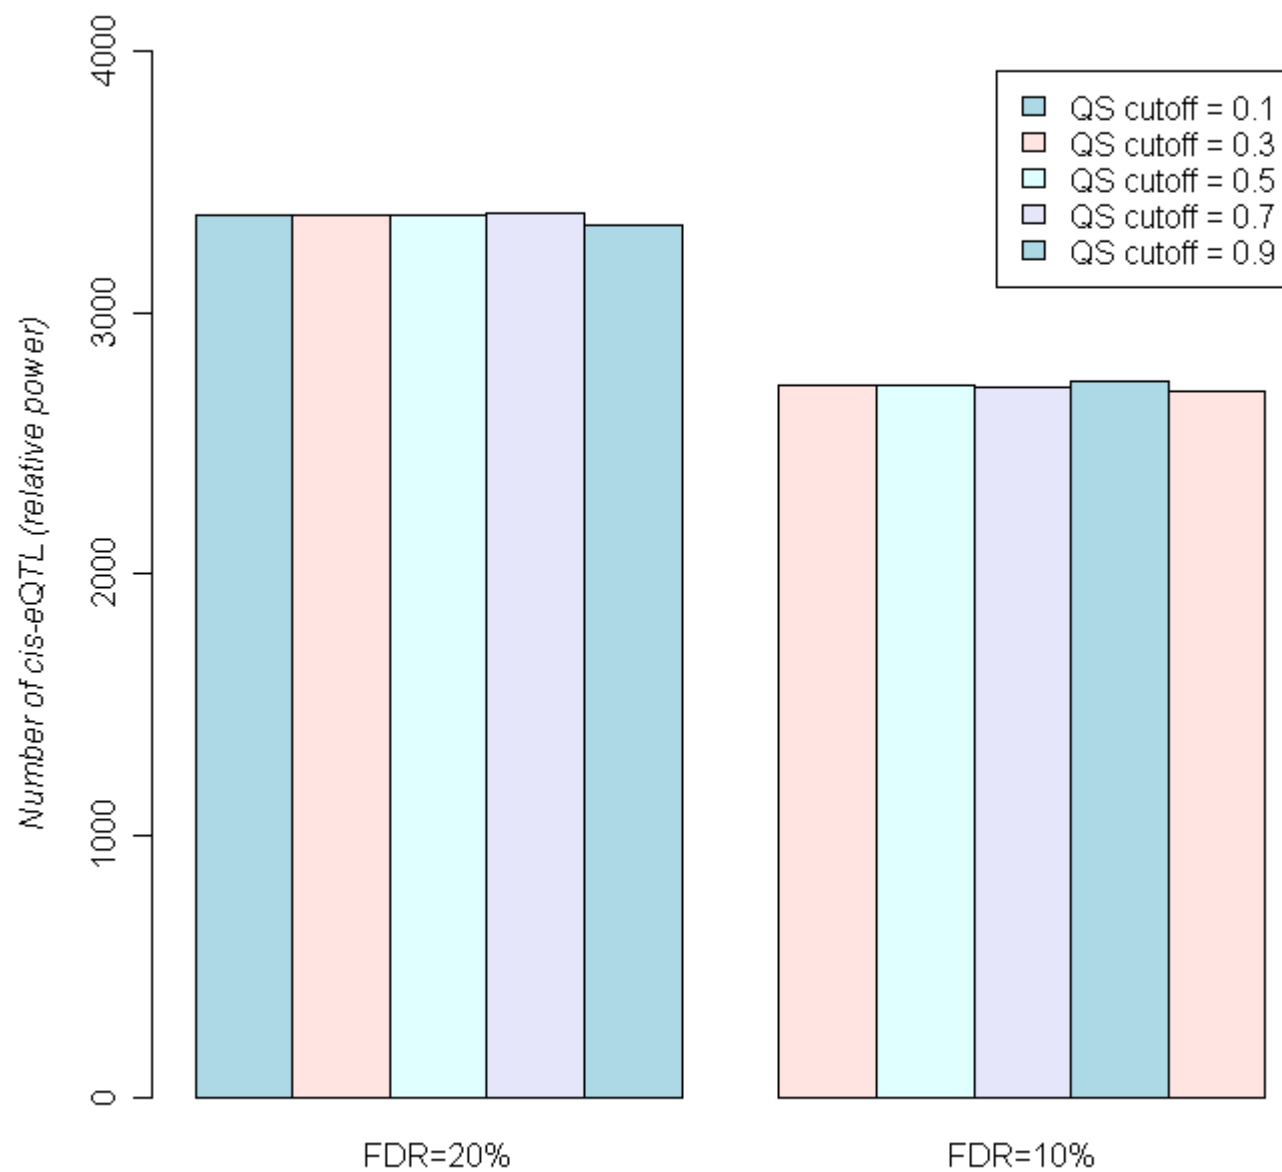

Supplement: 1471-2156-10-27-S4.pdf [file 1471-2156-10-27-S4.pdf]
